# Supplementary material for: The MYO6 interactome reveals adaptor complexes coordinating early endosome and cytoskeletal dynamics
Source: PubMed Central journal article supplement (PMC5891429; doi:10.15252/embr.201744884), 2018-02-21
Supplement: EMBR-19-e44884-s001.pdf [file EMBR-19-e44884-s001.pdf]

## Expanded View Figures

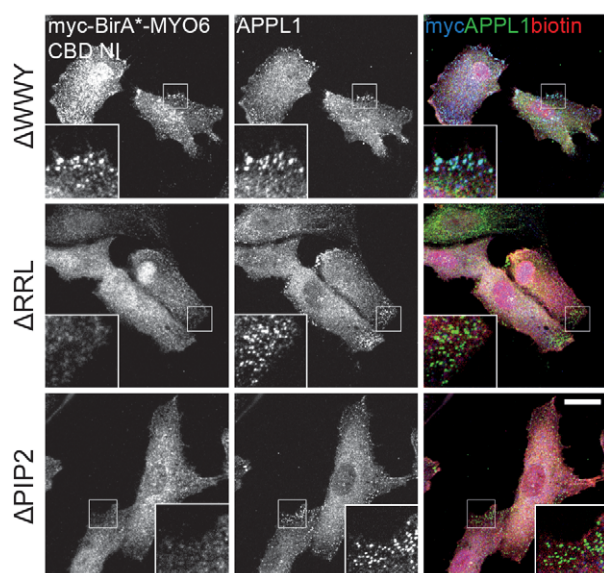

**Figure EV1. Characterisation of BirA\*-MYO6 CBD NI mutant cell lines.**

Immunofluorescence microscope images of RPE cells stably expressing myc-BirA\*-MYO6 CBD NI  $\Delta$ WWY (top row),  $\Delta$ RRL (middle row) and  $\Delta$ PIP2 (bottom row) treated with 50  $\mu$ M biotin for 24 h. Cells were immunostained with myc (blue) and APPL1 (green) antibodies. Scale bar, 20  $\mu$ m.

**Figure EV2. GIPC1 links MYO6 to multiple protein complexes.**

- A, B Top: The mammalian two-hybrid assay was used to test binding of (A) full-length GIPC1 against fragments of LARG encompassing amino acids 1–274 (PDZ-CC), 274–721 (RGSL), 721–1172 (DH-PH) and 1171–1544 (COOH) or LARG COOH against fragments GIPC1 encompassing amino acids 1–120 (NH2), 1–223 (NH2-PDZ), 120–223 (PDZ), 120–333 (PDZ-COOH), 223–333 (COOH) and (B) full-length SH3BP4 against fragments GIPC1 encompassing amino acids 1–120 (NH2), 120–223 (PDZ), 223–333 (COOH). Graphs show the mean relative luciferase activity from single representative experiments. Bottom: Schematic cartoon highlighting domain structure, fragments and binding sites found in LARG (left) and GIPC1 (right).
- C GFP nanobody immunoprecipitates from HEK293T cells transfected with GFP and GFP-tagged CARD10 full length or missing the C-terminal four amino acids ( $\Delta$ SEA). Samples were analysed by Western blot with the indicated antibodies.
- D The mammalian two-hybrid assay was used to test binding of full-length CARD10 and CARD10  $\Delta$ SEA to full-length GIPC1. Graphs show the mean relative luciferase activity from single representative experiments.
- E Widefield microscope images of HeLa cells transfected with GFP-MYO6<sup>+</sup> or GFP-MYO10 and treated with mock, LARG or SH3BP4 siRNA. Cells were immunostained with a GFP antibody. Scale bar, 20  $\mu$ m.
- F HeLa cells treated with mock, LARG or SH3BP4 siRNA were analysed by Western blot using LARG, SH3BP4 and GAPDH (loading control) antibodies.

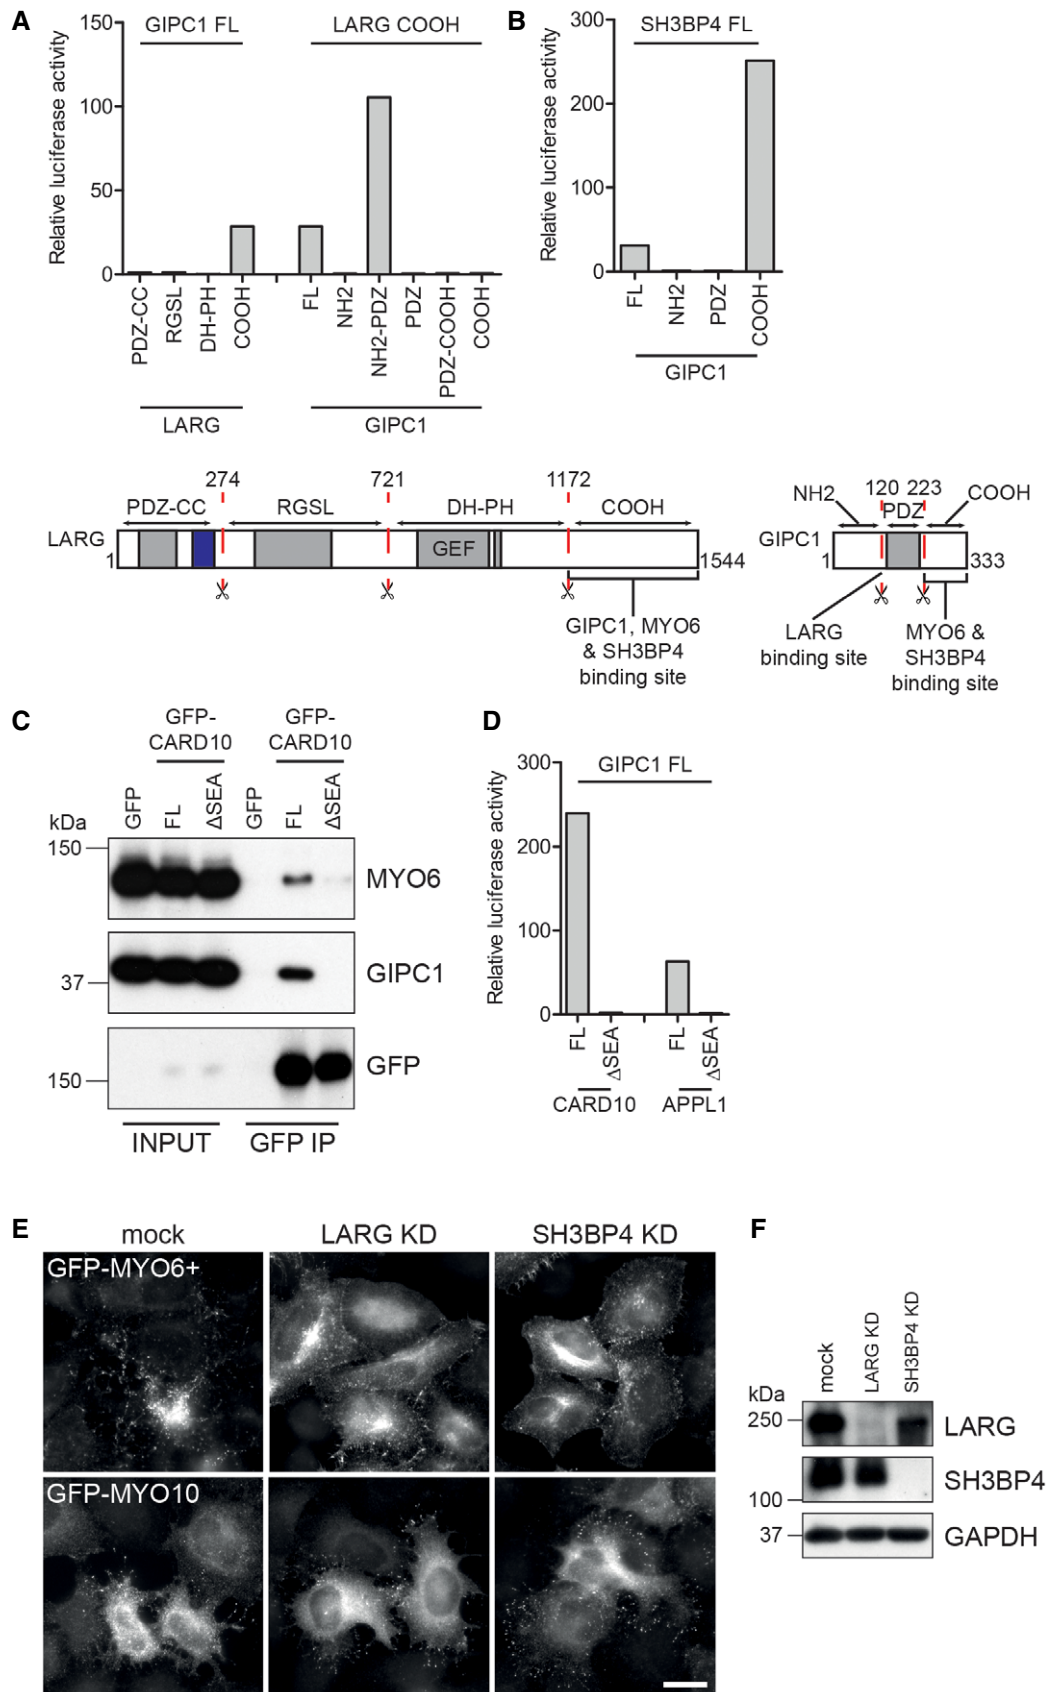

Figure EV2.

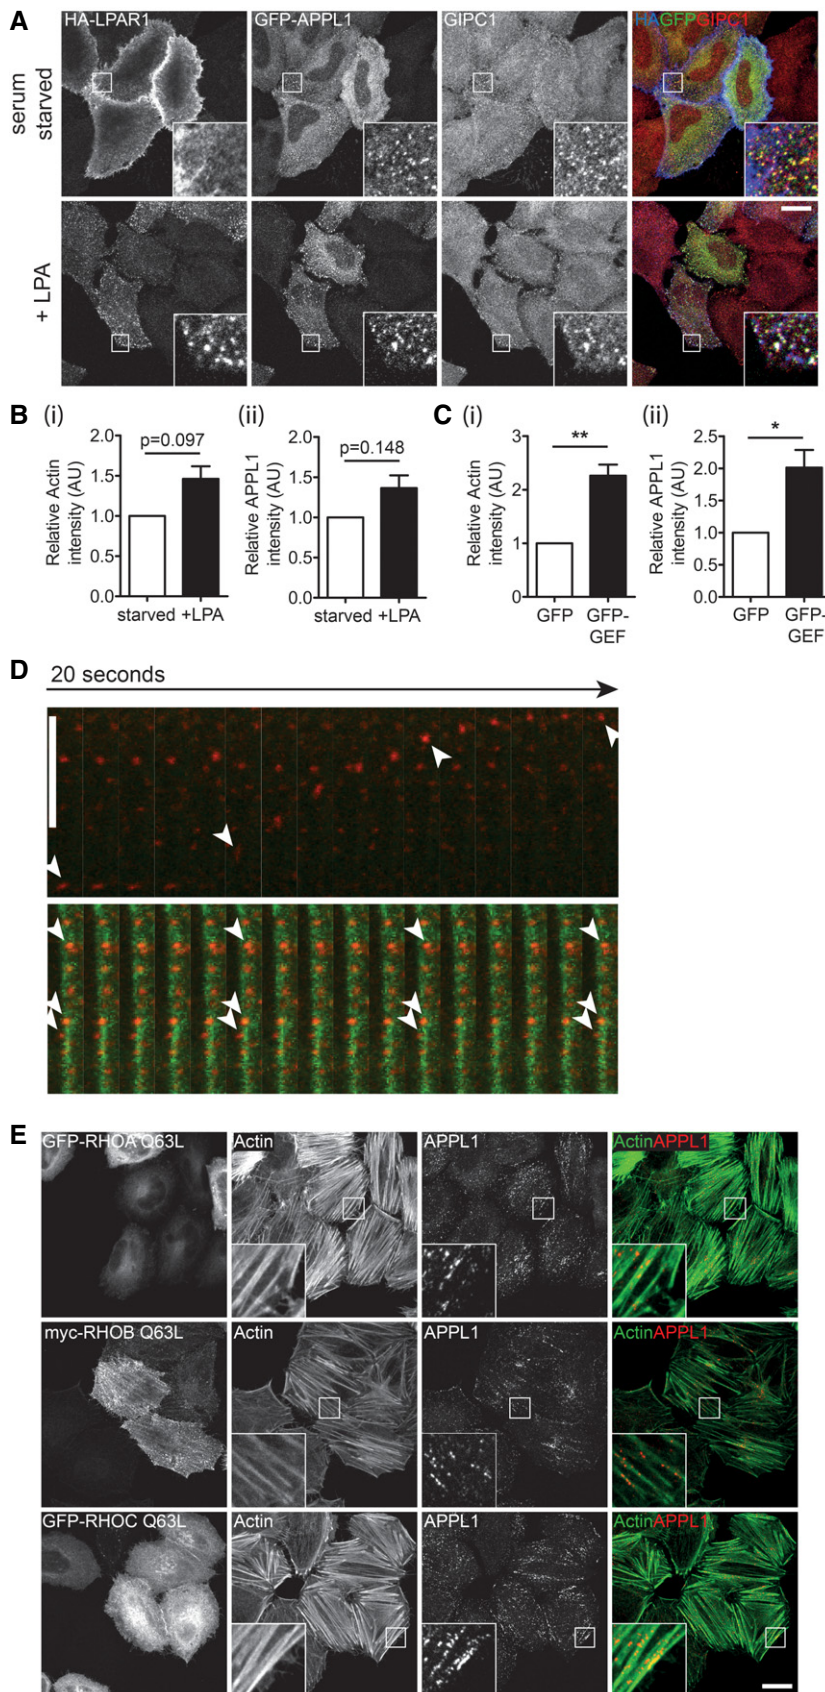

**Figure EV3. LPAR1-LARG-RHO-dependent actin reorganisation controls endosome positioning and motility.**

**A** Confocal microscope images of HeLa cells expressing GFP-APPL1 and HA-tagged LPAR1 and serum starved overnight. Cell surface LPAR1 was labelled with HA antibody (blue), and uptake of 10  $\mu$ M LPA for 0 min (upper panels) or 5 min (lower panels). Cells were fixed and immunostained with GFP (green) and GIPC1 (red) antibodies. Scale bar, 20  $\mu$ m.

**B** Quantification of (i) phalloidin and (ii) APPL1 signal intensity in cells serum starved or treated with 10  $\mu$ M LPA for 5 min. Data are the mean of  $n = 3$  independent experiments. Paired t-test  $P = 0.0974$  (i) and  $P = 0.1481$  (ii). Error bars indicate SEM.

**C** Quantification of (i) phalloidin and (ii) APPL1 signal intensity in GFP or GFP-LARG GEF transfected cells. Graph depicts mean from  $n = 4$  independent experiments. Significance was calculated using a one-sample t-test.  $*P < 0.05$ ,  $**P < 0.01$ . Error bars indicate SEM.

**D** Image sequences from spinning disc confocal microscope showing mCherry-APPL1 (red) and BFP-LifeAct (green) in mock (top row) or GFP-LARG GEF (bottom row) transfected HeLa cells. The motility of selected endosomes over time is highlighted by the arrowheads. Scale bar, 10  $\mu$ m; 0.5 s/frame (see also Movie EV1).

**E** Confocal microscope images of HeLa cells transfected with GFP-RHOA Q63L (top row), GFP-RHOB Q63L (middle row) and GFP-RHOC Q63L (bottom row). Cells were immunostained with an APPL1 antibody (red) and labelled with phalloidin to visualise actin (green). Scale bar, 20  $\mu$ m.

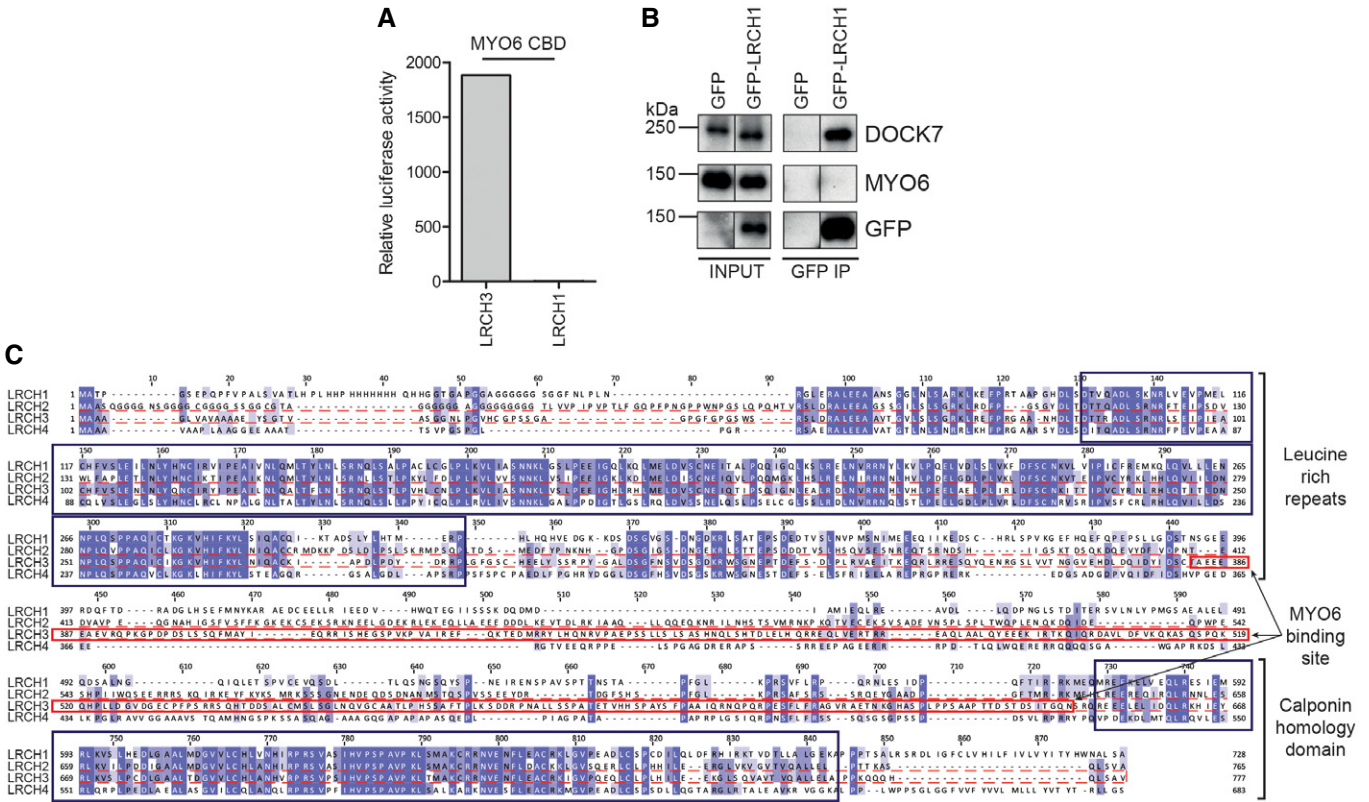

**Figure EV4. LRCR1 is not a MYO6 binding partner.**

- A The mammalian two-hybrid assay was used to test binding of full-length LRCR3 and LRCR1 to wild-type MYO6 tail. Graph shows the mean relative luciferase activity from a single representative experiment.
- B GFP nanobody immunoprecipitates from HEK293T cells transfected with GFP and full-length GFP-LRCH1 were analysed by Western blot with the indicated antibodies (GFP control IP same as Fig 5C).
- C Sequence alignment of the LRCR proteins. Boxes highlight the highly conserved leucine-rich repeats and calponin homology domains (blue) and the unconserved MYO6 binding site in LRCR3 (red).

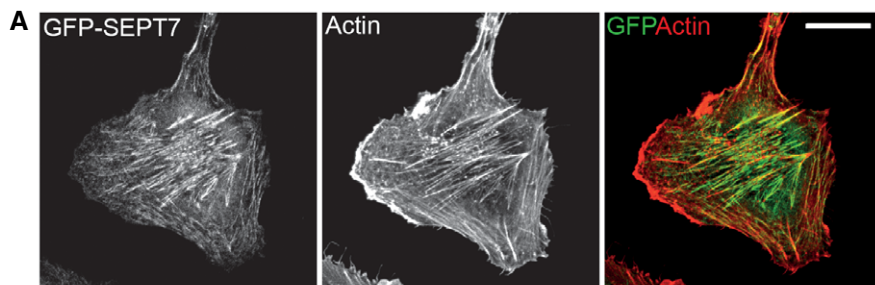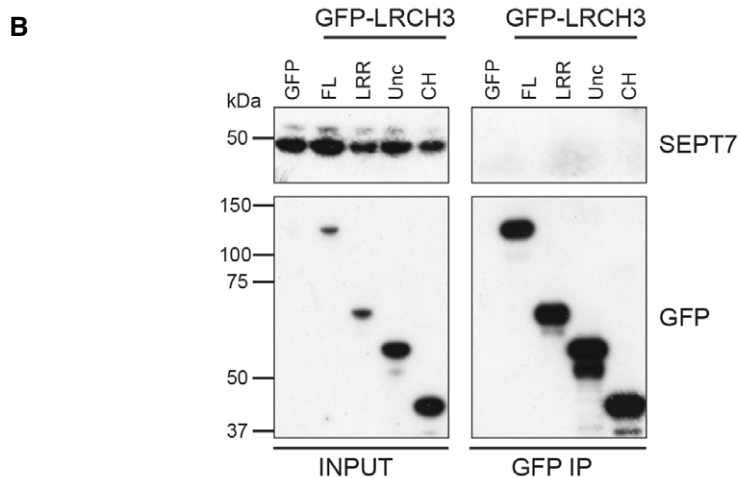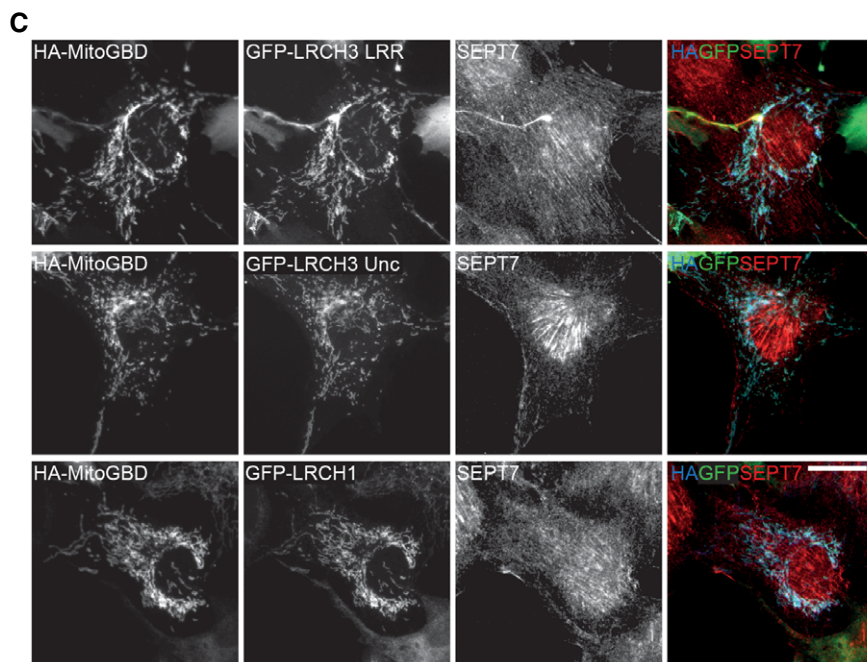

**Figure EV5. The DISP complex regulates septin organisation.**

A Confocal microscope images of RPE cells stably expressing GFP-SEPT7 and untransfected and immunostained with a GFP (green) antibody and labelled with phalloidin to visualise actin (red). Scale bar, 20  $\mu$ m.

B GFP nanobody immunoprecipitates from HEK293T cells transfected with GFP, full-length GFP-LRCH3 and GFP-LRCH3 fragments corresponding to amino acids 1–382 (LRR), 383–648 (Unc) or 649–777 (CH). Samples were analysed by Western blot with the indicated antibodies (same IP as Fig 5C).

C Widefield microscope images of RPE cells transfected with HA-MitoGBD and GFP-LRCH3 fragments corresponding to amino acids 1–382 (LRR; top row) and 383–648 (Unc; middle row) or full-length GFP-LRCH1 (bottom row). Cells were immunostained with HA (blue), GFP (green) and SEPT7 (red) antibodies. Scale bar, 20  $\mu$ m.
