# Supplementary material for: The MYO6 interactome reveals adaptor complexes coordinating early endosome and cytoskeletal dynamics
Source: PubMed Central journal article supplement (PMC5891429; doi:10.15252/embr.201744884), 2018-02-21

...FUJI·HRC·(SAFETY)...

...FUJI·HRC·(SAFETY)...

To 18.2.16

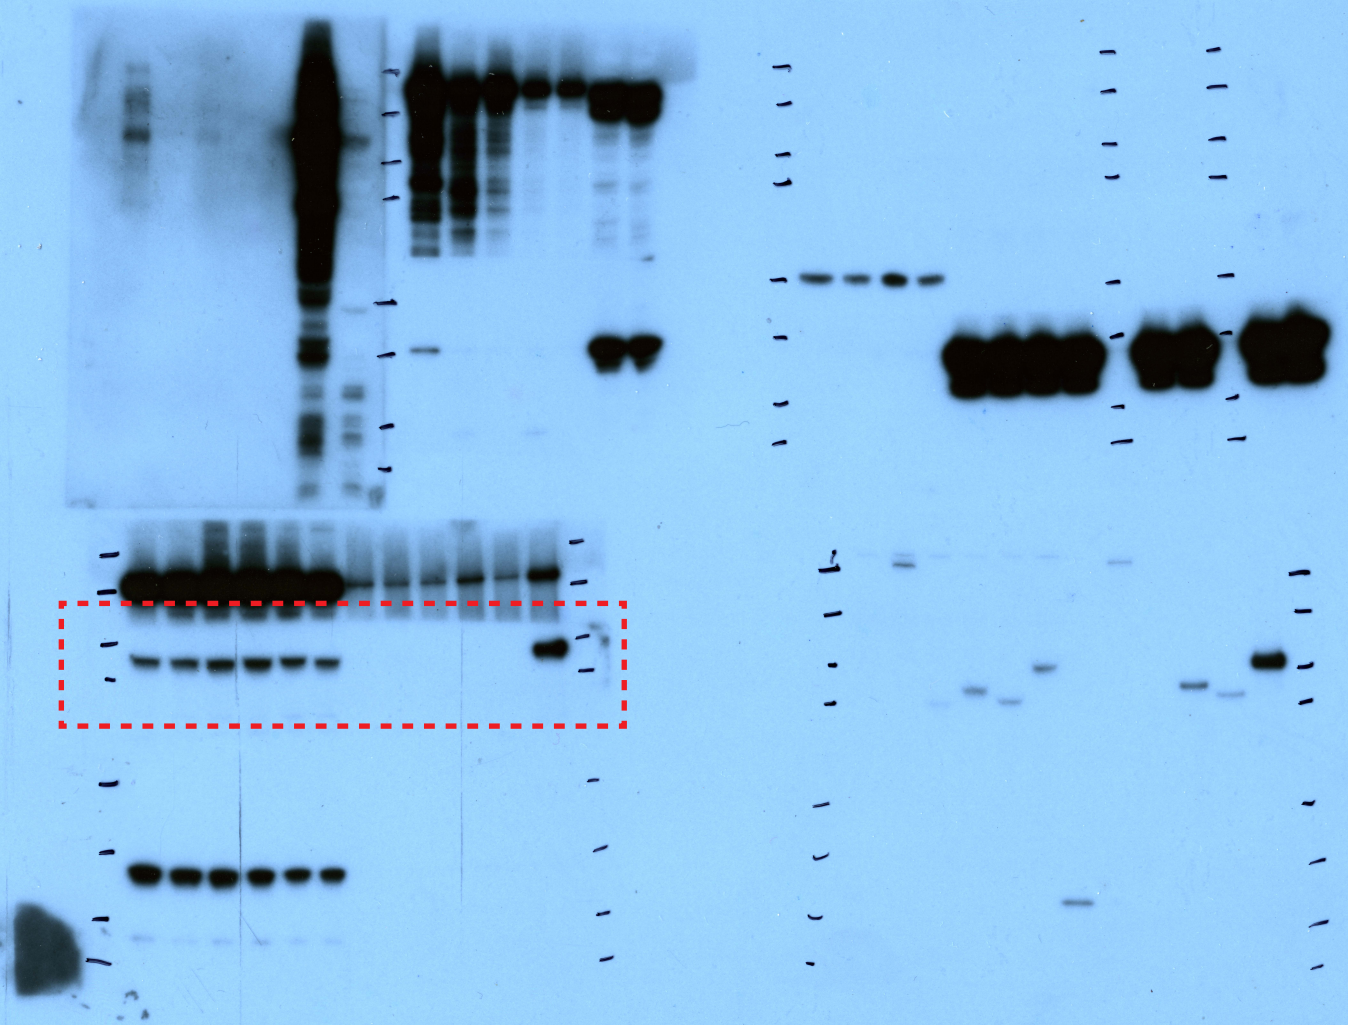

Supplement: EMBR-19-e44884-s003.pdf [file EMBR-19-e44884-s003.pdf]
